# Supplementary material for: Augmented Ouabain-Induced Vascular Response Reduces Cardiac Efficiency in Mice with Migraine-Associated Mutation in the Na+, K+-ATPase α2-Isoform
Source: MDPI journal article supplement (doi:10.3390/biomedicines11020344), 2023-01-25
Supplement: s1 [file s1]

**Table S1. Changes to cardiovascular variables after i.p. injection of ouabain (1.5 mg/kg; also presented in Figure 2 and 3).** At time = 0 minutes systolic blood pressure ( $79.63 \pm 2.89$  mmHg for WT and  $71.31 \pm 7.37$  mmHg for  $\alpha_2^{+/G301R}$  mice) and diastolic blood pressure ( $55.80 \pm 2.77$  mmHg for WT and  $47.14 \pm 7.65$  mmHg for  $\alpha_2^{+/G301R}$  mice) were similar between the two genotypes.

| Cardiovascular variables over time after i.p. injection of ouabain (1.5 mg/kg) |                  |                  |                  |                  |
|--------------------------------------------------------------------------------|------------------|------------------|------------------|------------------|
| Minutes after injection                                                        | 2 minutes        | 5 minutes        | 9 minutes        | 13 minutes       |
| Systolic pressure (mmHg)                                                       |                  |                  |                  |                  |
| Wild type                                                                      | $82.83 \pm 2.92$ | $86.67 \pm 2.23$ | $86.95 \pm 2.89$ | $89.83 \pm 2.91$ |
| $\alpha_2^{+/G301R}$                                                           | $75.44 \pm 8.01$ | $79.71 \pm 7.52$ | $80.98 \pm 6.91$ | $85.80 \pm 8.06$ |
| Diastolic pressure (mmHg)                                                      |                  |                  |                  |                  |
| Wild type                                                                      | $60.07 \pm 2.85$ | $63.84 \pm 1.73$ | $63.43 \pm 2.06$ | $65.16 \pm 2.01$ |
| $\alpha_2^{+/G301R}$                                                           | $50.91 \pm 7.94$ | $55.51 \pm 7.33$ | $56.88 \pm 6.91$ | $59.10 \pm 7.42$ |
| $\Delta$ Total peripheral resistance (mmHg • min/mL)                           |                  |                  |                  |                  |
| Wild type                                                                      | $1.11 \pm 0.39$  | $1.57 \pm 0.48$  | $1.40 \pm 0.42$  | $1.07 \pm 0.56$  |
| $\alpha_2^{+/G301R}$                                                           | $0.40 \pm 0.29$  | $1.05 \pm 0.30$  | $1.70 \pm 0.43$  | $2.13 \pm 0.47$  |
| $\Delta$ Stroke volume ( $\mu$ L)                                              |                  |                  |                  |                  |
| Wild type                                                                      | $-0.63 \pm 0.37$ | $-0.28 \pm 0.36$ | $-0.01 \pm 0.48$ | $0.60 \pm 0.76$  |
| $\alpha_2^{+/G301R}$                                                           | $0.06 \pm 0.33$  | $0.06 \pm 0.38$  | $-0.52 \pm 0.71$ | $-0.53 \pm 0.99$ |
| $\Delta$ Heart rate (BPM)                                                      |                  |                  |                  |                  |
| Wild type                                                                      | $1 \pm 7$        | $-6 \pm 4$       | $14 \pm 7$       | $-5 \pm 7$       |
| $\alpha_2^{+/G301R}$                                                           | $2 \pm 3$        | $3 \pm 4$        | $-2 \pm 8$       | $-14 \pm 14$     |
| $\Delta$ Cardiac output (mL/min)                                               |                  |                  |                  |                  |
| Wild type                                                                      | $-0.33 \pm 0.16$ | $-0.25 \pm 0.18$ | $-0.21 \pm 0.26$ | $0.21 \pm 0.45$  |
| $\alpha_2^{+/G301R}$                                                           | $0.06 \pm 0.17$  | $0.06 \pm 0.19$  | $-0.34 \pm 0.40$ | $-0.59 \pm 0.58$ |
| $\Delta$ Systolic time interval ratio (AU.)                                    |                  |                  |                  |                  |
| Wild type                                                                      | $0.02 \pm 0.03$  | $0.01 \pm 0.03$  | $0.00 \pm 0.03$  | $0.05 \pm 0.04$  |
| $\alpha_2^{+/G301R}$                                                           | $0.12 \pm 0.04$  | $0.14 \pm 0.03$  | $0.19 \pm 0.05$  | $0.19 \pm 0.04$  |
| $\Delta$ Pre-ejection period (ms)                                              |                  |                  |                  |                  |
| Wild type                                                                      | $0.5 \pm 0.7$    | $-0.0 \pm 0.8$   | $-0.4 \pm 0.9$   | $0.3 \pm 1.2$    |
| $\alpha_2^{+/G301R}$                                                           | $2.6 \pm 0.8$    | $3.2 \pm 0.5$    | $3.7 \pm 1.0$    | $3.6 \pm 0.7$    |
| $\Delta$ Left ventricular ejection time (ms)                                   |                  |                  |                  |                  |
| Wild type                                                                      | $-0.6 \pm 0.3$   | $-0.5 \pm 0.6$   | $-0.6 \pm 0.6$   | $-2.3 \pm 1.2$   |
| $\alpha_2^{+/G301R}$                                                           | $-1.9 \pm 0.6$   | $-2.5 \pm 0.5$   | $-3.7 \pm 0.8$   | $-3.7 \pm 0.9$   |
| $\Delta$ Systolic duration (ms)                                                |                  |                  |                  |                  |
| Wild type                                                                      | $-0.2 \pm 0.6$   | $-0.5 \pm 0.8$   | $-1.1 \pm 1.0$   | $-2.0 \pm 1.6$   |
| $\alpha_2^{+/G301R}$                                                           | $0.7 \pm 0.6$    | $0.8 \pm 0.5$    | $0.1 \pm 0.8$    | $-0.2 \pm 0.7$   |
| $\Delta$ Arterial dP/dt <sub>max</sub> (mmHg/s)                                |                  |                  |                  |                  |
| Wild type                                                                      | $-226 \pm 128$   | $-206 \pm 160$   | $-83 \pm 202$    | $10 \pm 240$     |
| $\alpha_2^{+/G301R}$                                                           | $-16 \pm 95$     | $-30 \pm 136$    | $129 \pm 227$    | $228 \pm 274$    |
| $\Delta$ Arterial dP/dt <sub>min</sub> (mmHg/s)                                |                  |                  |                  |                  |
| Wild type                                                                      | $-8 \pm 29$      | $-44 \pm 90$     | $-103 \pm 101$   | $-181 \pm 149$   |
| $\alpha_2^{+/G301R}$                                                           | $-93 \pm 52$     | $-156 \pm 70$    | $-117 \pm 99$    | $-323 \pm 181$   |

**Table S2. Changes to cardiovascular variables after i.p. injection of vehicle (NaCl 0.9%; also presented in Supplementary Figure 1 and 2.** Just before i.p. injection of vehicle (0.9% NaCl; time = 0 minutes in Supplementary Figure 1 and 2), systolic blood pressure ( $64.32 \pm 6.29$  mmHg for WT and  $70.06 \pm 3.98$  mmHg for  $\alpha_2^{+/G301R}$  mice) and diastolic blood pressure ( $35.00 \pm 5.37$  mmHg for WT and  $42.12 \pm 5.26$  mmHg for  $\alpha_2^{+/G301R}$  mice) were similar between the two genotypes.

| Cardiovascular variables over time after i.p. injection of vehicle (0.9% NaCl) |                  |                  |                    |                   |
|--------------------------------------------------------------------------------|------------------|------------------|--------------------|-------------------|
| Minutes after injection                                                        | 2 minutes        | 5 minutes        | 9 minutes          | 13 minutes        |
| Systolic pressure (mmHg)                                                       |                  |                  |                    |                   |
| Wild type                                                                      | $66.47 \pm 5.00$ | $64.94 \pm 6.48$ | $67.00 \pm 7.88$   | $65.50 \pm 10.63$ |
| $\alpha_2^{+/G301R}$                                                           | $68.76 \pm 2.40$ | $68.82 \pm 2.50$ | $62.23 \pm 4.51$   | $69.19 \pm 3.84$  |
| Diastolic pressure (mmHg)                                                      |                  |                  |                    |                   |
| Wild type                                                                      | $37.40 \pm 4.38$ | $35.24 \pm 6.08$ | $35.52 \pm 6.74$   | $34.13 \pm 9.22$  |
| $\alpha_2^{+/G301R}$                                                           | $40.99 \pm 3.75$ | $40.90 \pm 3.60$ | $38.55 \pm 7.08$   | $42.48 \pm 5.53$  |
| $\Delta$ Total peripheral resistance (mmHg • min/mL)                           |                  |                  |                    |                   |
| Wild type                                                                      | $0.03 \pm 0.12$  | $-0.13 \pm 0.17$ | $0.23 \pm 0.28$    | $0.18 \pm 0.50$   |
| $\alpha_2^{+/G301R}$                                                           | $0.15 \pm 0.28$  | $0.07 \pm 0.26$  | $-0.15 \pm 0.24$   | $-0.05 \pm 0.11$  |
| $\Delta$ Stroke volume ( $\mu$ L)                                              |                  |                  |                    |                   |
| Wild type                                                                      | $0.73 \pm 0.41$  | $0.59 \pm 0.31$  | $-0.88 \pm 1.87$   | $-0.91 \pm 1.70$  |
| $\alpha_2^{+/G301R}$                                                           | $-0.27 \pm 0.22$ | $-0.12 \pm 0.23$ | $-1.15 \pm 0.62$   | $-0.19 \pm 0.26$  |
| $\Delta$ Heart rate (BPM)                                                      |                  |                  |                    |                   |
| Wild type                                                                      | $3.91 \pm 3.63$  | $1.61 \pm 4.65$  | $12.17 \pm 33.09$  | $-5.04 \pm 42.52$ |
| $\alpha_2^{+/G301R}$                                                           | $-4.76 \pm 2.65$ | $-5.75 \pm 5.31$ | $-10.57 \pm 10.97$ | $3.92 \pm 15.17$  |
| $\Delta$ Cardiac output (mL/min)                                               |                  |                  |                    |                   |
| Wild type                                                                      | $0.48 \pm 0.26$  | $0.35 \pm 0.19$  | $-0.28 \pm 0.51$   | $-0.63 \pm 0.27$  |
| $\alpha_2^{+/G301R}$                                                           | $-0.18 \pm 0.11$ | $-0.13 \pm 0.10$ | $-0.61 \pm 0.50$   | $0.04 \pm 0.16$   |
| $\Delta$ Systolic time interval ratio (AU.)                                    |                  |                  |                    |                   |
| Wild type                                                                      | $0.03 \pm 0.06$  | $0.02 \pm 0.08$  | $-0.05 \pm 0.05$   | $0.05 \pm 0.01$   |
| $\alpha_2^{+/G301R}$                                                           | $0.05 \pm 0.08$  | $-0.04 \pm 0.08$ | $-0.08 \pm 0.05$   | $-0.02 \pm 0.05$  |
| $\Delta$ Pre-ejection period (ms)                                              |                  |                  |                    |                   |
| Wild type                                                                      | $1.3 \pm 2.2$    | $0.6 \pm 3.0$    | $-2.2 \pm 2.7$     | $1.0 \pm 1.6$     |
| $\alpha_2^{+/G301R}$                                                           | $2.0 \pm 3.5$    | $-1.5 \pm 3.3$   | $-2.9 \pm 1.8$     | $-1.5 \pm 1.9$    |
| $\Delta$ Left ventricular ejection time (ms)                                   |                  |                  |                    |                   |
| Wild type                                                                      | $-0.1 \pm 0.5$   | $0.4 \pm 0.3$    | $-1.1 \pm 1.5$     | $-1.4 \pm 2.5$    |
| $\alpha_2^{+/G301R}$                                                           | $0.0 \pm 0.3$    | $0.7 \pm 0.3$    | $0.1 \pm 1.0$      | $-0.9 \pm 0.9$    |
| $\Delta$ Systolic duration (ms)                                                |                  |                  |                    |                   |
| Wild type                                                                      | $1.2 \pm 2.0$    | $1.0 \pm 2.9$    | $-3.3 \pm 4.2$     | $-0.4 \pm 4.1$    |
| $\alpha_2^{+/G301R}$                                                           | $2.0 \pm 3.6$    | $-0.7 \pm 3.2$   | $-2.7 \pm 1.8$     | $-2.4 \pm 1.7$    |
| $\Delta$ Arterial dP/dt <sub>max</sub> (mmHg/s)                                |                  |                  |                    |                   |
| Wild type                                                                      | $-110 \pm 162$   | $-225 \pm 139$   | $-273 \pm 299$     | $-505 \pm 134$    |
| $\alpha_2^{+/G301R}$                                                           | $-292 \pm 179$   | $-346 \pm 180$   | $-975 \pm 541$     | $-395 \pm 224$    |
| $\Delta$ Arterial dP/dt <sub>min</sub> (mmHg/s)                                |                  |                  |                    |                   |
| Wild type                                                                      | $-47 \pm 82$     | $57 \pm 131$     | $-65 \pm 188$      | $75 \pm 141$      |
| $\alpha_2^{+/G301R}$                                                           | $113 \pm 72$     | $115 \pm 68$     | $540 \pm 260$      | $113 \pm 48$      |
