# Supplementary material for: Augmented Ouabain-Induced Vascular Response Reduces Cardiac Efficiency in Mice with Migraine-Associated Mutation in the Na+, K+-ATPase α2-Isoform
Source: MDPI journal article supplement (doi:10.3390/biomedicines11020344), 2023-01-25
Supplement: s1 [file s1]

## Supplementary Figure 1

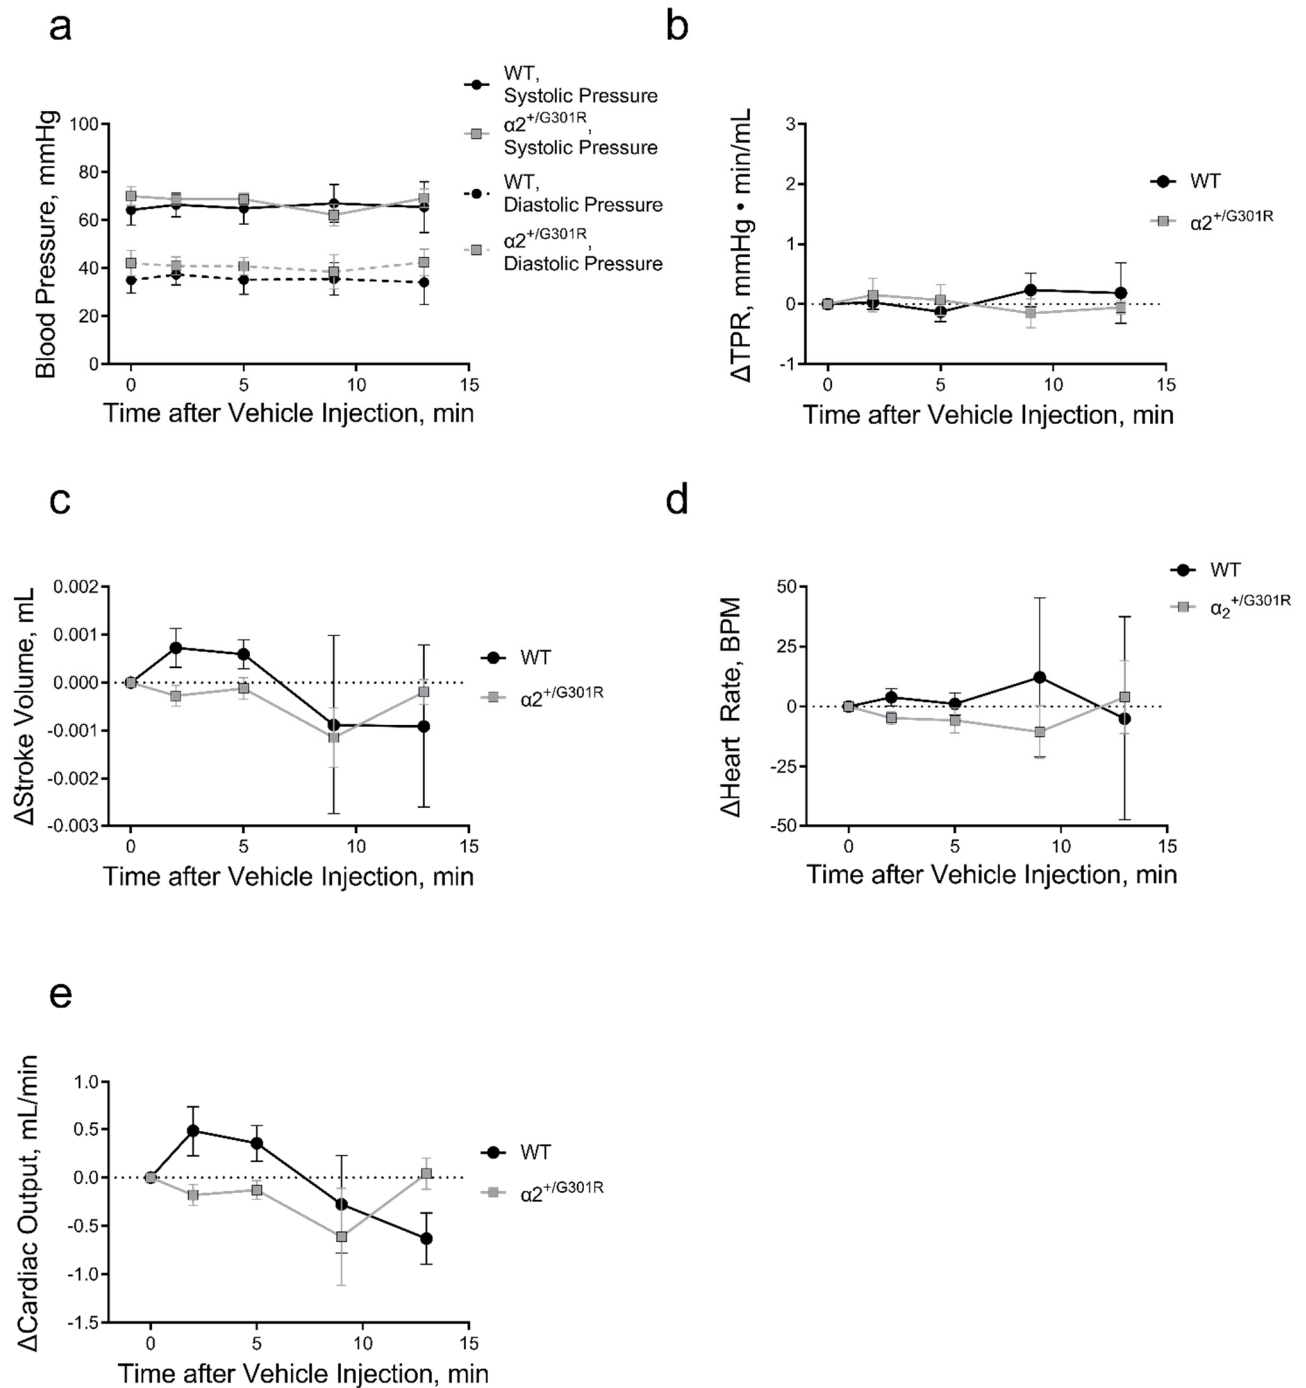

**Figure S1. Vehicle administration (0.9% NaCl) did not change major cardiovascular variables in wild-type (WT) and  $\alpha_2^{+/G301R}$  mice. (a) Blood pressure, (b) total peripheral resistance (TPR), (c) stroke volume, (d) heart rate, and (e) cardiac output were all unaffected by vehicle administration in both  $\alpha_2^{+/G301R}$  and WT mice. Data were compared with two-way repeated measures ANOVA.  $n = 4$ .**

## Supplementary Figure 2

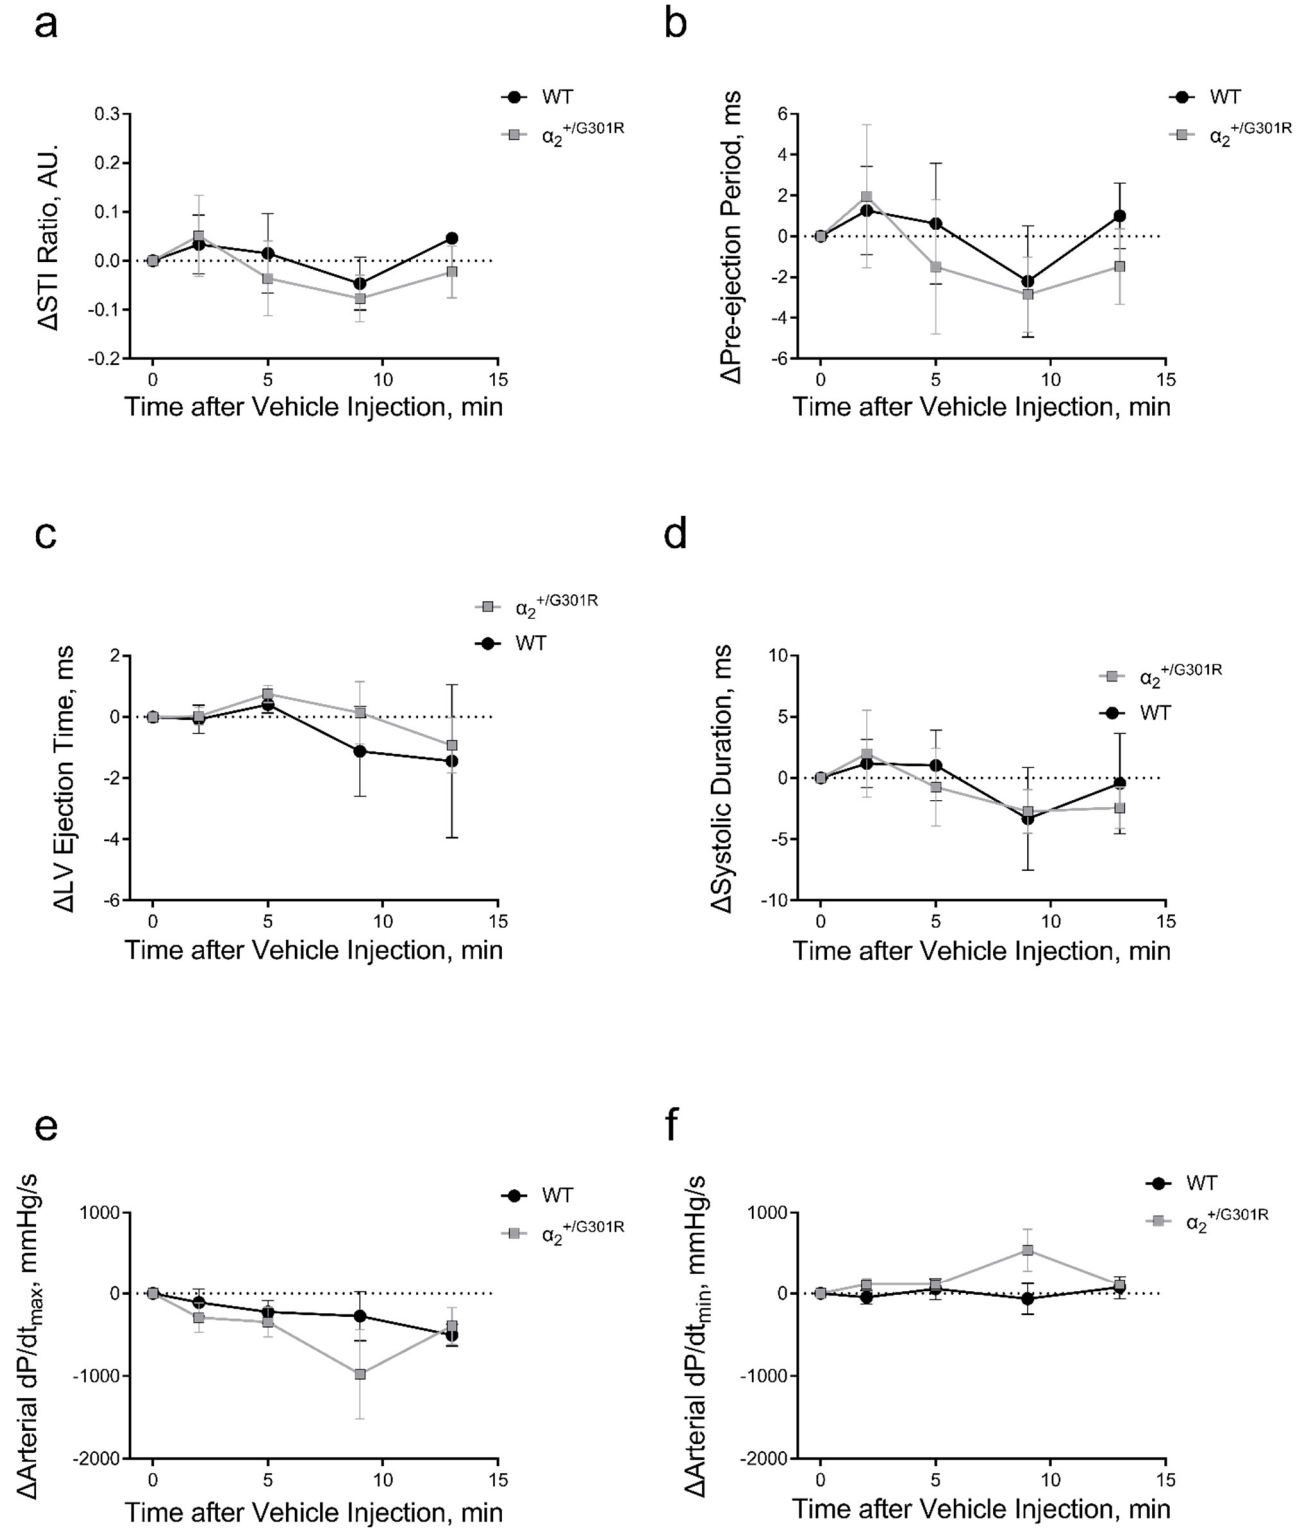

**Figure S2. Vehicle administration (0.9% NaCl) did not alter cardiac function in both wild-type (WT) isoform-specific  $\alpha_2^{+/G301R}$  mice.** Following vehicle injection, (a) the ratio of systolic time intervals (STI Ratio), (b) pre-ejection period (c) left ventricular ejection time (LV ejection time), (d) systolic duration, (e) arterial dP/dt<sub>max</sub>, and (f) arterial dP/dt<sub>min</sub> were unchanged in both WT and  $\alpha_2^{+/G301R}$  mice. Data were compared with two-way repeated measures ANOVA.  $n = 3-4$ .

Supplementary Figure 3

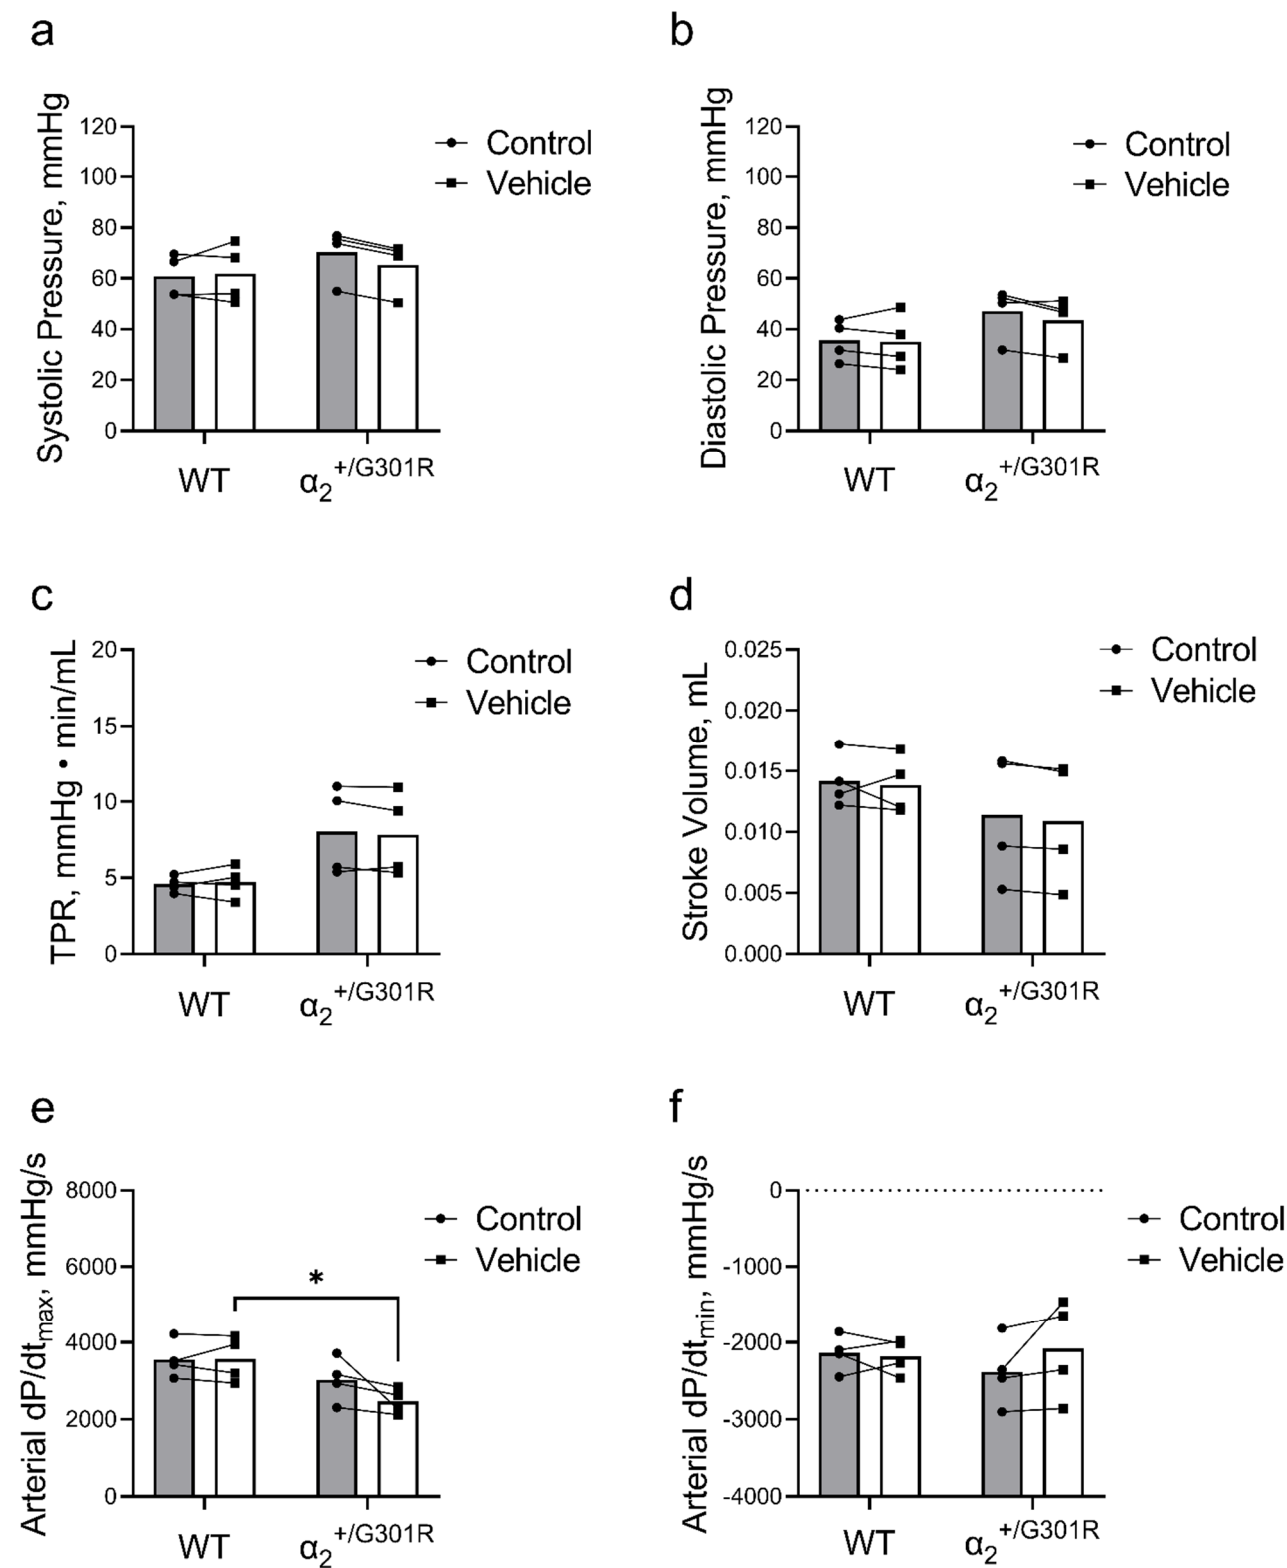

**Figure S3. Cardiovascular variables were similar before and after vehicle (0.9% NaCl) administration during atrial pacing at 11.3 Hz (678 BPM) *in vivo*.** (a) Systolic blood pressure (control vs. vehicle;  $60.82 \pm 4.22$  mmHg vs.  $61.86 \pm 5.71$  mmHg for WT and  $70.25 \pm 5.13$  mmHg vs.  $65.70 \pm 5.01$  mmHg for  $\alpha_2^{+/G301R}$  mice), (b) diastolic blood pressure (control vs. ouabain;  $35.62 \pm 3.98$  mmHg vs.  $35.03 \pm 5.39$  mmHg for WT and  $47.00 \pm 5.09$  mmHg vs.  $43.53 \pm 5.06$  mmHg for  $\alpha_2^{+/G301R}$  mice), (c) TPR (control vs. ouabain;  $4.58 \pm 0.26$  mmHg  $\cdot$  min/mL vs.  $4.72 \pm 0.52$  mmHg  $\cdot$  min/mL for WT and  $8.04 \pm 1.45$  mmHg  $\cdot$  min/mL vs.  $7.85 \pm 1.38$  mmHg  $\cdot$  min/mL for  $\alpha_2^{+/G301R}$  mice), and (d) stroke volume (control vs. ouabain;  $14.17 \pm 1.09$   $\mu$ L vs.  $13.83 \pm 1.18$   $\mu$ L for WT and  $11.40 \pm 2.60$   $\mu$ L vs.  $10.88 \pm 2.52$   $\mu$ L for  $\alpha_2^{+/G301R}$  mice) did not change after injection with vehicle when the heart was paced at 11.3 Hz. (e) Arterial dP/dt<sub>max</sub> was greater in wild-type (WT) mice compared to  $\alpha_2^{+/G301R}$  mice after vehicle treatment (WT vs.  $\alpha_2^{+/G301R}$  mice;  $3558 \pm 241$  mmHg/s vs.  $3031 \pm 290$  mmHg/s under control conditions and  $3567 \pm 293$  mmHg/s vs.  $2467 \pm 165$  mmHg/s after vehicle injection;  $P = 0.0192$ ). (f) Arterial dP/dt<sub>min</sub> was similar between the two genotypes before and after vehicle administration (control vs. vehicle;  $-2138 \pm 121$  mmHg/s vs.  $-2182 \pm 114$  mmHg/s for WT and  $-2384 \pm 224$  mmHg/s vs.  $-2083 \pm 322$  mmHg/s for  $\alpha_2^{+/G301R}$  mice). Data were compared with two-way repeated measures ANOVA followed by Bonferroni's multiple comparison test. \* $P < 0.05$ ; WT vs.  $\alpha_2^{+/G301R}$  mice after vehicle administration.  $n = 4$ .

## Supplementary Figure 4

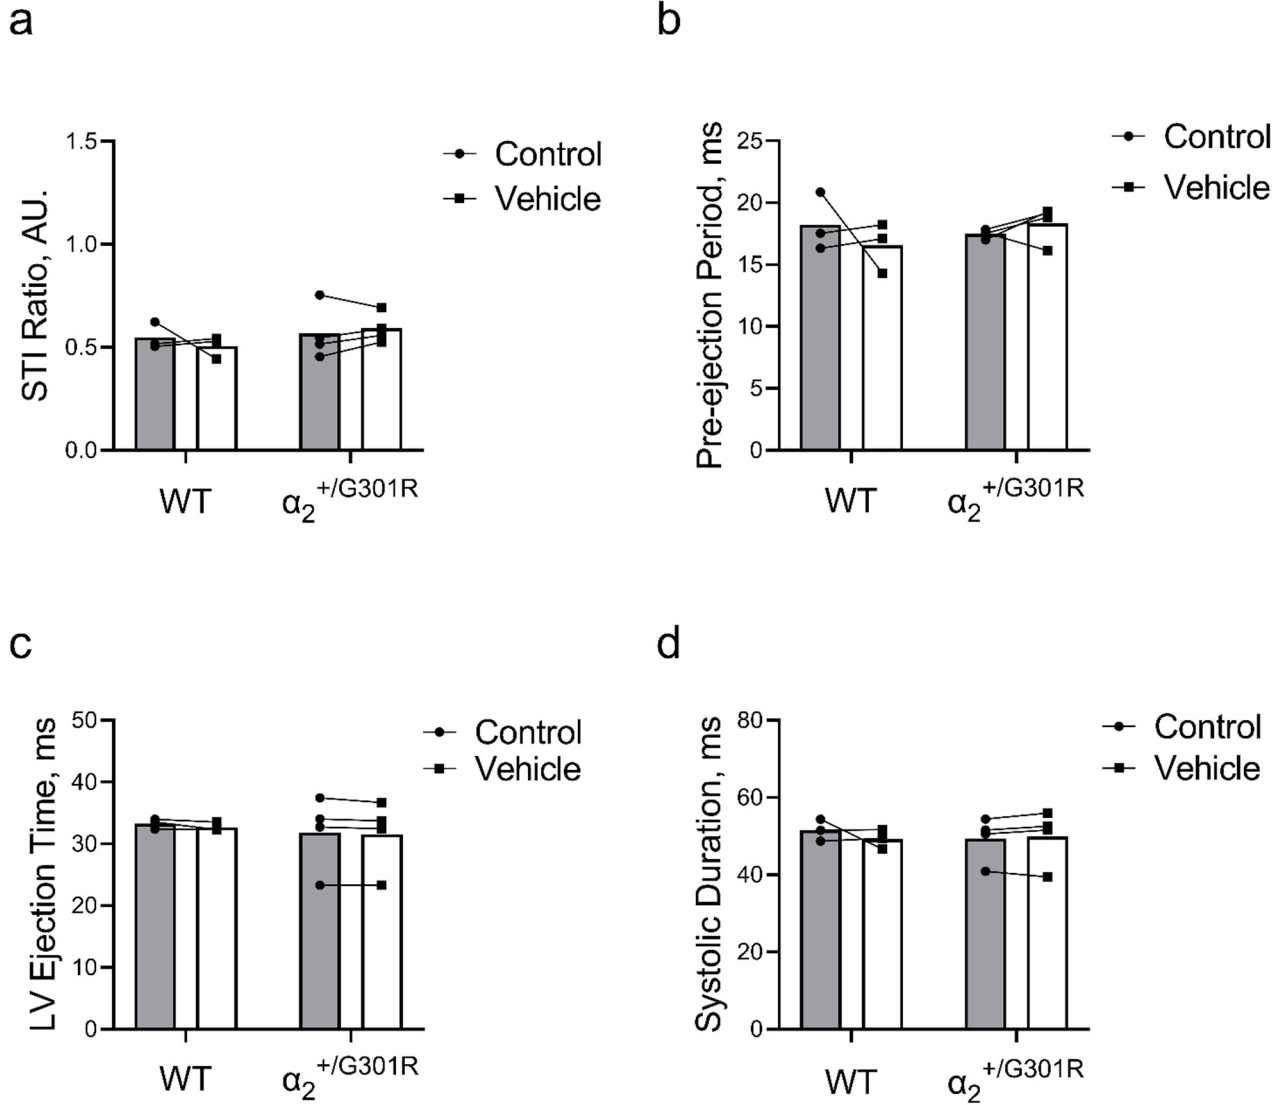

**Figure S4. The systolic time intervals were unchanged after vehicle (0.9% NaCl) administration in  $\alpha_2^{+/G301R}$  and wild-type (WT) mice during atrial pacing at 11.3 Hz (678 BPM).** One WT mouse was excluded due to uninterpretable electrocardiogram recording, and the systolic time intervals were not calculated for this mouse. (a) The systolic time interval ratio (STI ratio; control vs. vehicle;  $0.55 \pm 0.04$  vs.  $0.51 \pm 0.03$  for WT and  $0.57 \pm 0.07$  vs.  $0.59 \pm 0.04$  for  $\alpha_2^{+/G301R}$  mice), (b) pre-ejection period (control vs. vehicle;  $18.3 \pm 1.4$  ms vs.  $16.5 \pm 1.2$  ms for WT and  $17.5 \pm 0.2$  ms vs.  $18.4 \pm 0.7$  ms for  $\alpha_2^{+/G301R}$  mice), (c) left ventricular ejection time (LV ejection time; control vs. vehicle;  $33.3 \pm 0.5$  ms vs.  $32.7 \pm 0.4$  ms for WT and  $31.9 \pm 3.0$  ms vs.  $31.5 \pm 2.9$  ms for  $\alpha_2^{+/G301R}$  mice), and (d) systolic duration were unchanged after vehicle administration (control vs. vehicle;  $51.5 \pm 1.6$  ms vs.  $49.3 \pm 1.5$  ms for WT and  $49.4 \pm 2.9$  ms vs.  $49.9 \pm 3.6$  ms for  $\alpha_2^{+/G301R}$  mice). Data were compared with two-way repeated measures ANOVA.  $n = 3-4$ .
